# Supplementary material for: Maternal High Fat Diet Anticipates the AD-like Phenotype in 3xTg-AD Mice by Epigenetic Dysregulation of Aβ Metabolism
Source: MDPI journal article supplement (doi:10.3390/cells12020220), 2023-01-04
Supplement: s1 [file s1]

Supplementary Table S1. GENE REGULATION

| Refseq    | Symbol | Description                                                     | Fold Change | p-Value         |
|-----------|--------|-----------------------------------------------------------------|-------------|-----------------|
| NM_175628 | A2m    | Alpha-2-macroglobulin                                           | 1.59        | 0.523688        |
| NM_013454 | Abca1  | ATP-binding cassette, sub-family A (ABC1), member 1             | 1.12        | 0.745455        |
| NM_009599 | Ache   | Acetylcholinesterase                                            | 1.26        | 0.646704        |
| NM_007404 | Adam9  | A disintegrin and metallopeptidase domain 9 (meltrin gamma)     | 1.34        | 0.424105        |
| NM_177034 | Apba1  | Amyloid beta (A4) precursor protein binding, family A, member 1 | 1.33        | 0.430311        |
| NM_018758 | Apba3  | Amyloid beta (A4) precursor protein-binding, family A, member 3 | 1.33        | 0.261720        |
| NM_009685 | Apbb1  | Amyloid beta (A4) precursor protein-binding, family B, member 1 | 1.15        | 0.860086        |
| NM_009686 | Apbb2  | Amyloid beta (A4) precursor protein-binding, family B, member 2 | 1.33        | 0.547291        |
| NM_146104 | Aph1a  | Anterior pharynx defective 1a homolog (C. elegans)              | 1.67        | 0.423375        |
| NM_007467 | Aplp1  | Amyloid beta (A4) precursor-like protein 1                      | 1.27        | 0.722291        |
| NM_009691 | Aplp2  | Amyloid beta (A4) precursor-like protein 2                      | 1.41        | 0.473123        |
| NM_009692 | Apoa1  | Apolipoprotein A-I                                              | 1.67        | 0.306639        |
| NM_009696 | Apoe   | Apolipoprotein E                                                | 0.84        | 0.595652        |
| NM_007471 | App    | Amyloid beta (A4) precursor protein                             | 0.71        | 0.839977        |
| NM_011792 | Bace1  | Beta-site APP cleaving enzyme 1                                 | <b>4.76</b> | <b>0.015838</b> |
| NM_019517 | Bace2  | Beta-site APP-cleaving enzyme 2                                 | 0.71        | 0.793287        |
| NM_009738 | Bche   | Butyrylcholinesterase                                           | 0.99        | 0.982585        |
| NM_007540 | Bdnf   | Brain derived neurotrophic factor                               | 0.89        | 0.625365        |
| NM_009810 | Casp3  | Caspase 3                                                       | 0.99        | 0.991140        |
| NM_007609 | Casp4  | Caspase 4, apoptosis-related cysteine peptidase                 | 1.18        | 0.897619        |
| NM_007659 | Cdk1   | Cyclin-dependent kinase 1                                       | 1.58        | 0.401086        |
| NM_007668 | Cdk5   | Cyclin-dependent kinase 5                                       | 1.50        | 0.521562        |
| NM_183294 | Cdkl1  | Cyclin-dependent kinase-like 1 (CDC2-related kinase)            | 1.12        | 0.930541        |
| NM_009891 | Chat   | Choline acetyltransferase                                       | 1.77        | 0.089544        |
| NM_013492 | Clu    | Clusterin                                                       | 0.56        | 0.756672        |
| NM_007798 | Ctsb   | Cathepsin B                                                     | 1.33        | 0.962375        |
| NM_009982 | Ctsc   | Cathepsin C                                                     | 1.06        | 0.670115        |
| NM_009983 | Ctsd   | Cathepsin D                                                     | 1.58        | 0.308861        |
| NM_007800 | Ctsg   | Cathepsin G                                                     | 1.26        | 0.587461        |
| NM_009984 | Ctsl   | Cathepsin L                                                     | 1.13        | 0.622795        |
| NM_177821 | Ep300  | E1A binding protein p300                                        | 1.35        | 0.777057        |
| NM_023913 | Ern1   | Endoplasmic reticulum (ER) to nucleus signalling 1              | <b>4.57</b> | <b>0.005916</b> |
| NM_008083 | Gap43  | Growth associated protein 43                                    | 1.06        | 0.995759        |

|              |           |                                                                                          |             |                 |
|--------------|-----------|------------------------------------------------------------------------------------------|-------------|-----------------|
| NM_010308    | Gnao1     | Guanine nucleotide binding protein, alpha o                                              | 0.79        | 0.947277        |
| NM_010311    | Gnaz      | Guanine nucleotide binding protein, alpha z subunit                                      | 0.84        | 0.794213        |
| NM_008142    | Gnb1      | Guanine nucleotide binding protein (G protein), beta 1                                   | 1.19        | 0.769099        |
| NM_010312    | Gnb2      | Guanine nucleotide binding protein (G protein), beta 2                                   | 1.56        | 0.714193        |
| NM_013531    | Gnb4      | Guanine nucleotide binding protein (G protein), beta 4                                   | 1.89        | 0.454148        |
| NM_010313    | Gnb5      | Guanine nucleotide binding protein (G protein), beta 5                                   | 1.00        | 0.660407        |
| NM_025277    | Gng10     | Guanine nucleotide binding protein (G protein), gamma 10                                 | 1.19        | 0.788950        |
| NM_025331    | Gng11     | Guanine nucleotide binding protein (G protein), gamma 11                                 | 1.07        | 0.841063        |
| NM_010316    | Gng3      | Guanine nucleotide binding protein (G protein), gamma 3                                  | 0.88        | 0.566693        |
| NM_010317    | Gng4      | Guanine nucleotide binding protein (G protein), gamma 4                                  | 1.59        | 0.501457        |
| NM_010318    | Gng5      | Guanine nucleotide binding protein (G protein), gamma 5                                  | <b>2.24</b> | <b>0.036035</b> |
| NM_010319    | Gng7      | Guanine nucleotide binding protein (G protein), gamma 7                                  | <b>3.36</b> | <b>0.007533</b> |
| NM_010320    | Gng8      | Guanine nucleotide binding protein (G protein), gamma 8                                  | <b>2.36</b> | 0.220630        |
| NM_010314    | Gngt1     | Guanine nucleotide binding protein (G protein), gamma transducing activity polypeptide 1 | 0.93        | 0.940182        |
| NM_023121    | Gngt2     | Guanine nucleotide binding protein (G protein), gamma transducing activity polypeptide 2 | 1.40        | 0.478175        |
| NM_001031667 | Gsk3a     | Glycogen synthase kinase 3 alpha                                                         | 0.71        | 0.849351        |
| NM_019827    | Gsk3b     | Glycogen synthase kinase 3 beta                                                          | 1.41        | 0.359260        |
| NM_016763    | Hsd17b 10 | Hydroxysteroid (17-beta) dehydrogenase 10                                                | 1.06        | 0.511186        |
| NM_031156    | Ide       | Insulin degrading enzyme                                                                 | <b>0.20</b> | <b>0.000970</b> |
| NM_010514    | Igf2      | Insulin-like growth factor 2                                                             | 0.89        | 0.713865        |
| NM_010554    | Il1a      | Interleukin 1 alpha                                                                      | 1.12        | 0.631255        |
| NM_010568    | Insr      | Insulin receptor                                                                         | 0.85        | 0.496445        |
| NM_008509    | Lpl       | Lipoprotein lipase                                                                       | 1.18        | 0.924373        |
| NM_008512    | Lrp1      | Low density lipoprotein receptor-related protein 1                                       | 0.94        | 0.959813        |
| NM_008514    | Lrp6      | Low density lipoprotein receptor-related protein 6                                       | 0.89        | 0.811740        |
| NM_001080926 | Lrp8      | Low density lipoprotein receptor-related protein 8, apolipoprotein e receptor            | 1.61        | 0.383559        |
| NM_010838    | Mapt      | Microtubule-associated protein tau                                                       | 0.66        | 0.999831        |

|                  |               |                                                                 |             |                 |
|------------------|---------------|-----------------------------------------------------------------|-------------|-----------------|
| NM_010824        | Mpo           | Myeloperoxidase                                                 | 1.72        | 0.565523        |
| NM_001039<br>934 | Map2          | Microtubule-associated protein 2                                | 0.70        | 0.720247        |
| NM_144931        | Nae1          | NEDD8 activating enzyme E1 subunit 1                            | <b>2.11</b> | 0.120261        |
| NM_021607        | Ncstn         | Nicastrin                                                       | <b>0.19</b> | <b>0.023541</b> |
| NM_026361        | Pkp4          | Plakophilin 4                                                   | 0.63        | 0.680570        |
| NM_008872        | Plat          | Plasminogen activator, tissue                                   | 1.12        | 0.992679        |
| NM_008873        | Plau          | Plasminogen activator, urokinase                                | 1.59        | 0.232588        |
| NM_008877        | Plg           | Plasminogen                                                     | 1.56        | 0.375379        |
| NM_011101        | Prkca         | Protein kinase C, alpha                                         | 0.75        | 0.984260        |
| NM_008855        | Prkcb         | Protein kinase C, beta                                          | 1.06        | 0.655583        |
| NM_011102        | Prkcg         | Protein kinase C, gamma                                         | 0.56        | 0.950422        |
| NM_011103        | Prkcd         | Protein kinase C, delta                                         | 1.33        | 0.621815        |
| NM_011104        | Prkce         | Protein kinase C, epsilon                                       | 1.53        | 0.303289        |
| NM_008857        | Prkci         | Protein kinase C, iota                                          | 1.33        | 0.261720        |
| NM_008859        | Prkcq         | Protein kinase C, theta                                         | 1.41        | 0.672387        |
| NM_008860        | Prkcz         | Protein kinase C, zeta                                          | 0.79        | 0.723034        |
| NM_008943        | Psen1         | Presenilin 1                                                    | 1.00        | 0.690470        |
| NM_011183        | Psen2         | Presenilin 2                                                    | 1.12        | 0.498989        |
| NM_008458        | Serpina<br>3c | Serine (or cysteine) peptidase inhibitor,<br>clade A, member 3C | 1.59        | 0.424057        |
| NM_009221        | Snca          | Synuclein, alpha                                                | <b>0.42</b> | 0.989376        |
| NM_033610        | Sncb          | Synuclein, beta                                                 | 1.12        | 0.645409        |
| NM_026842        | Ubqln1        | Ubiquilin 1                                                     | 0.84        | 0.738966        |
| NM_025407        | Uqcrc1        | Ubiquinol-cytochrome c reductase core<br>protein 1              | 0.99        | 0.997635        |
| NM_025899        | Uqcrc2        | Ubiquinol cytochrome c reductase core<br>protein 2              | 0.94        | 0.958692        |
| NM_007393        | Actb          | Actin, beta                                                     | 0.67        | 0.849114        |
| NM_009735        | B2m           | Beta-2 microglobulin                                            | 1.11        | 0.638706        |
| NM_008084        | Gapdh         | Glyceraldehyde-3-phosphate<br>dehydrogenase                     | 1.00        | N/A             |
| NM_010368        | Gusb          | Glucuronidase, beta                                             | 1.26        | 0.612282        |
| NM_008302        | Hsp90a<br>b1  | Heat shock protein 90 alpha (cytosolic),<br>class B member 1    | 1.08        | 0.590556        |

Supplementary Table S2. ANTIBODIES

| Primary Antibody                  | Host   | Catalogue Reference              |
|-----------------------------------|--------|----------------------------------|
| pFoxO1 <sup>ser256</sup>          | Rabbit | Cell Signaling Technology #9461  |
| FoxO1                             | Rabbit | Cell Signaling Technology #2880  |
| AKT                               | Rabbit | Cell Signaling Technology #9272  |
| pAKT <sup>ser473</sup>            | Rabbit | Cell Signaling Technology #4060  |
| pFoxO3a <sup>ser253</sup>         | Rabbit | Cell Signaling Technology #9466  |
| FoxO3a                            | Rabbit | Cell Signaling Technology #2497  |
| pCREB <sup>ser133</sup>           | Rabbit | Cell Signaling Technology #9198  |
| CREB                              | Rabbit | Cell Signaling Technology #4820  |
| pGSK3 $\beta$ <sup>ser9</sup>     | Rabbit | Cell Signaling Technology #9336  |
| GSK3 $\beta$                      | Rabbit | Cell Signaling Technology #12456 |
| Actin                             | Rabbit | ABCAM ab8227                     |
| pSTAT5 <sup>Tyr694</sup>          | Mouse  | Cell Signaling Technology #9356  |
| STAT5                             | Rabbit | Cell Signaling Technology #94205 |
| pSTAT3 <sup>Tyr705</sup>          | Rabbit | Cell Signaling Technology #9145  |
| STAT3                             | Rabbit | Cell Signaling Technology #9139  |
| pNF- $\kappa$ B <sup>Ser536</sup> | Rabbit | ABCAM ab76302                    |
| NF- $\kappa$ B p65                | Rabbit | ABCAM ab16502                    |

Supplementary Table S3. PRIMERS USED FOR CHIP ANALYSES

| Gene      | Primer Sequences                     |
|-----------|--------------------------------------|
| BACE1     | <b>FW1</b> TACTCAGCACAGGCCTTACC      |
|           | <b>REV1</b> AACTACATGGTCTACGTGTTCC   |
| BACE1     | <b>FW2</b> GAGAAGTGTATGATATTGGTTCC   |
|           | <b>REV2</b> CTAGGCAGGCTGGGGAGGC      |
| ERN1      | <b>FW1</b> AACACTTCAAATTGTGTCTGCTGC  |
|           | <b>REV1</b> GTTTTTGAAGAGAAAAGGTTATCC |
| ERN1      | <b>FW2</b> GAGGAACGGATGGCTGCTGG      |
|           | <b>REV2</b> GACCTCTAGAGCAGAGCAAGG    |
| IDE       | <b>FW</b> TCCTTGCTTCGTAAGTCCACG      |
|           | <b>REV</b> GTCCTTCCTAGGCCAGCAGG      |
| NICASTRIN | <b>FW</b> GGAGAGGCAAGATGGCTACG       |
|           | <b>REV</b> GCAGGTCCAGGCAAAGGAGG      |
