# Supplementary figures and images for: Maternal High Fat Diet Anticipates the AD-like Phenotype in 3xTg-AD Mice by Epigenetic Dysregulation of Aβ Metabolism
Source: MDPI journal article supplement (doi:10.3390/cells12020220), 2023-01-04

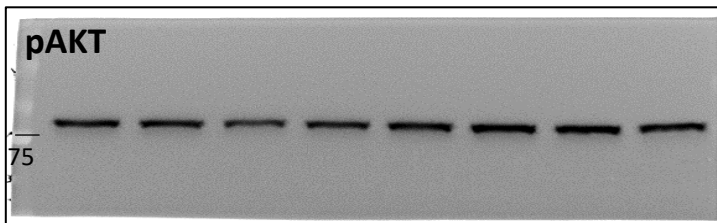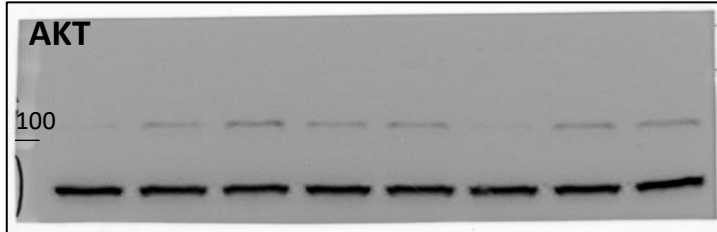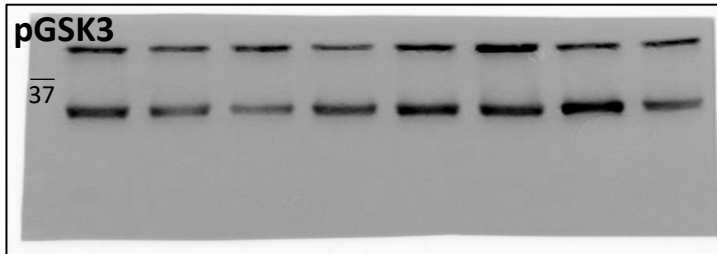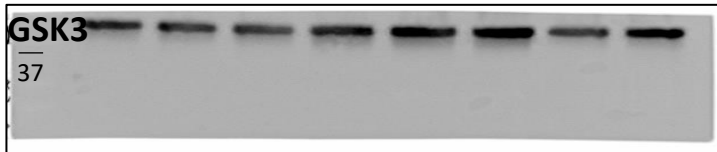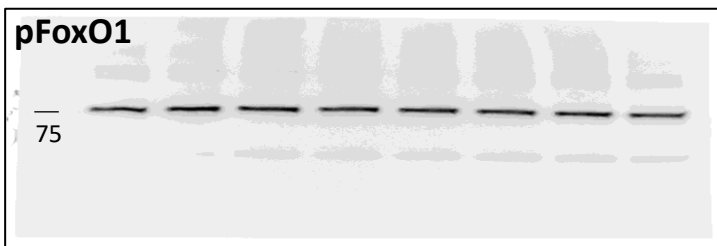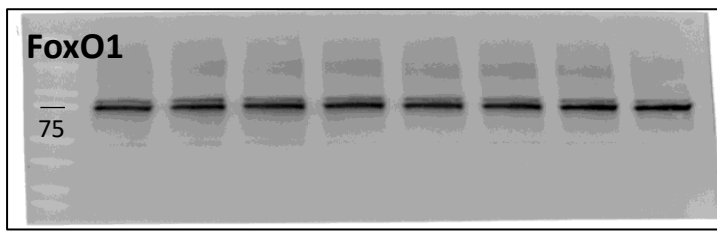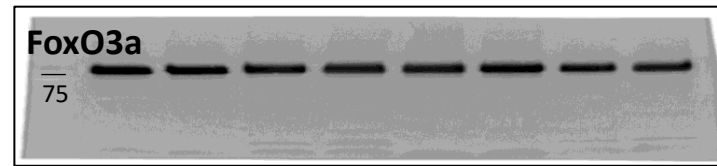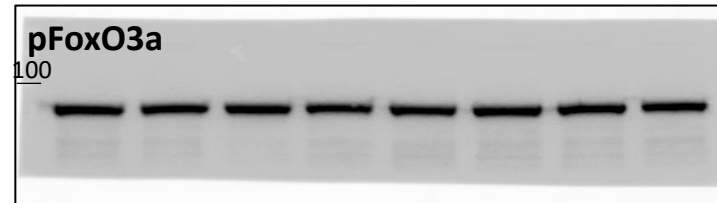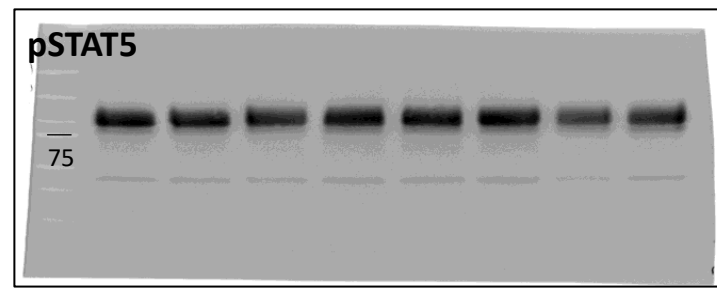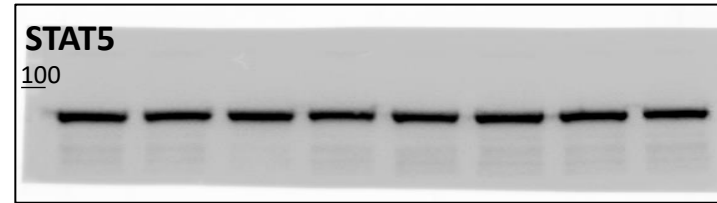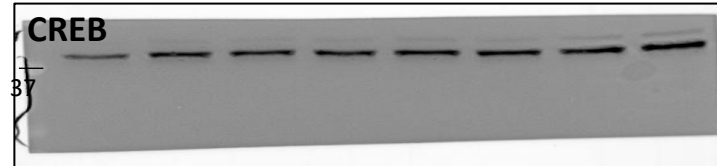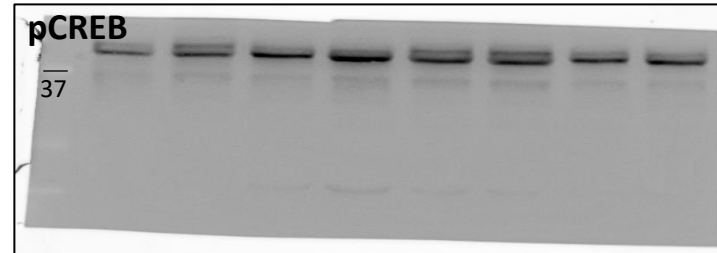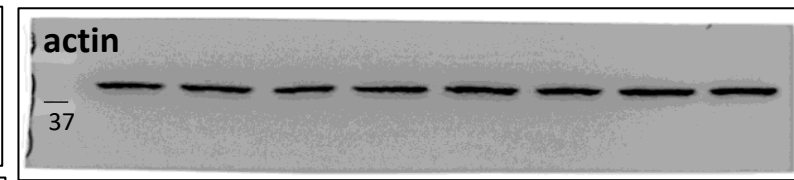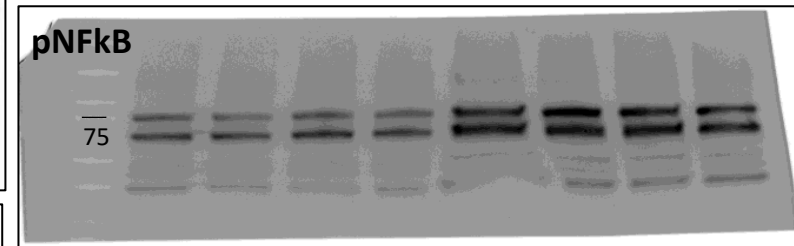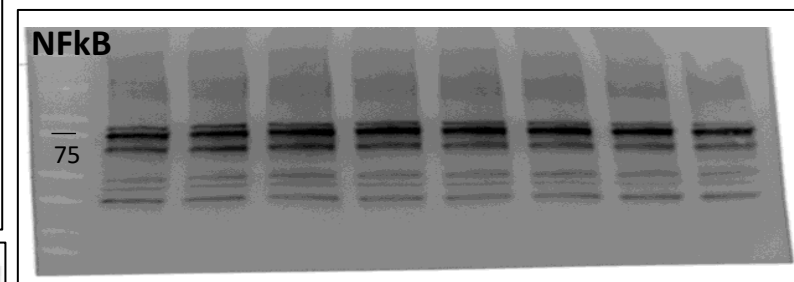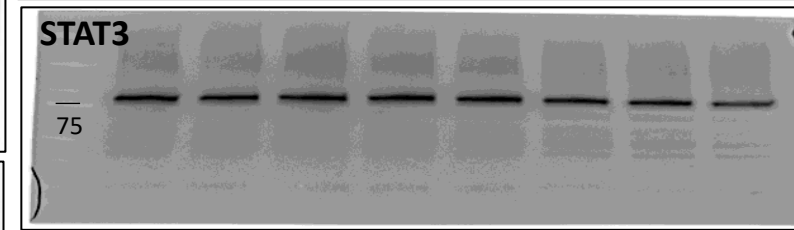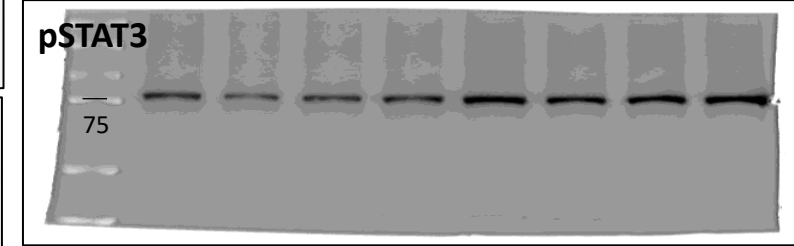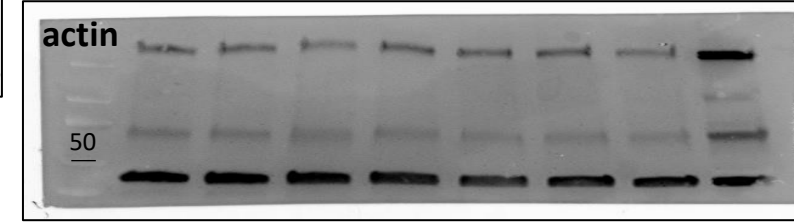

Supplement: s1 [file s1]
